# Supplementary material
Source: MDPI journal article supplement (https://www.mdpi.com/2072-4292/15/19/4890)
Supplement: s1 [file s1]

## Supplementary Materials

**Table S1.** Published spectral indices for the estimation of ChlFa parameters in other studies.

R represents the reflectance.

| Index Name | Formula                                                                   | Reference                 |
|------------|---------------------------------------------------------------------------|---------------------------|
| ARI2       | $R_{800} * (1/R_{550} - 1/R_{700})$                                       | Stratoulías, et al. [62]  |
| CRI1       | $1/R_{510} - 1/R_{550}$                                                   | Stratoulías, et al. [62]  |
| CRI2       | $1/R_{510} - 1/R_{700}$                                                   | Stratoulías, et al. [62]  |
| CUR        | $R_{683}^2 / (R_{675} * R_{691})$                                         | Zarco-Tejada, et al. [20] |
| Datt       | $(R_{850} - R_{710}) / (R_{850} + R_{680})$                               | Zhang, et al. [19]        |
| EVI        | $2.5 * (R_{780} - R_{675}) / (R_{782} + 6 * R_{675} - 7.5 * R_{445} + 1)$ | Stratoulías, et al. [62]  |
| Maccioni   | $(R_{780} - R_{710}) / (R_{780} + R_{680})$                               | Zhang, et al. [19]        |
| mND705     | $(R_{750} - R_{705}) / (R_{750} + R_{705} - 2 * R_{445})$                 | Stratoulías, et al. [62]  |
| mSR705     | $(R_{750} - R_{445}) / (R_{705} - R_{445})$                               | Stratoulías, et al. [62]  |
| NDSI       | $(R_{680} - R_{935}) / (R_{680} + R_{935})$                               | Zhang, et al. [19]        |
| NDVI       | $(R_{782} - R_{675}) / (R_{782} + R_{675})$                               | Stratoulías, et al. [62]  |
| NDVI750    | $(R_{750} - R_{705}) / (R_{750} + R_{705})$                               | Stratoulías, et al. [62]  |
| NPCI       | $(R_{680} - R_{430}) / (R_{680} + R_{430})$                               | Zhang, et al. [19]        |
| OCAR       | $R_{630} / R_{680}$                                                       | Zhang, et al. [19]        |
| PRI        | $(R_{531} - R_{570}) / (R_{531} + R_{570})$                               | Stratoulías, et al. [62]  |
| PSNDA      | $(R_{800} - R_{680}) / (R_{800} + R_{680})$                               | Zhang, et al. [19]        |
| PSRI       | $(R_{680} - R_{500}) / R_{750}$                                           | Stratoulías, et al. [62]  |
| PSSRa      | $R_{800} / R_{680}$                                                       | Zhang, et al. [19]        |
| RGI        | $R_{690} / R_{550}$                                                       | Stratoulías, et al. [62]  |
| RSI        | $R_{680} / R_{935}$                                                       | Zhang, et al. [19]        |
| SIPI       | $(R_{800} - R_{445}) / (R_{800} - R_{680})$                               | Stratoulías, et al. [62]  |
| SRPI       | $R_{430} / R_{680}$                                                       | Zhang, et al. [19]        |
| SRI        | $R_{800} / R_{680}$                                                       | Stratoulías, et al. [62]  |
| VOG1       | $R_{740} / R_{720}$                                                       | Stratoulías, et al. [62]  |
| VOG2       | $(R_{734} - R_{747}) / (R_{715} + R_{726})$                               | Stratoulías, et al. [62]  |
| VOG3       | $(R_{734} - R_{747}) / (R_{715} + R_{720})$                               | Stratoulías, et al. [62]  |
| WBI        | $R_{900} / R_{970}$                                                       | Stratoulías, et al. [62]  |
| YCAR       | $R_{600} / R_{680}$                                                       | Zhang, et al. [19]        |

**Table S2.** The given indices for the estimation of ChlFa parameters. R and the suffixes ( $\lambda_1$  or  $\lambda_2$ ) represent the reflectance and wavelength, respectively.

| Index Name | Wavelength                      | Formula                                                                                                                      |
|------------|---------------------------------|------------------------------------------------------------------------------------------------------------------------------|
| R          | $\lambda_1$                     | $R_{\lambda_1}$                                                                                                              |
| SR         | $\lambda_1$ and $\lambda_2$     | $R_{\lambda_1}/R_{\lambda_2}$                                                                                                |
| D          | $\lambda_1$ and $\lambda_2$     | $R_{\lambda_1} - R_{\lambda_2}$                                                                                              |
| ND         | $\lambda_1$ and $\lambda_2$     | $(R_{\lambda_1} - R_{\lambda_2})/(R_{\lambda_1} + R_{\lambda_2})$                                                            |
| ID         | $\lambda_1$ and $\lambda_2$     | $(\frac{1}{R_{\lambda_1}}) - (\frac{1}{R_{\lambda_2}})$                                                                      |
| DDn        | $\lambda_1$ and $\Delta\lambda$ | $2R_{\lambda_1} - R_{\lambda_1-\Delta\lambda} - R_{\lambda_1+\Delta\lambda}$                                                 |
| mSR1       | $\lambda_1$ and $\Delta\lambda$ | $(R_{\lambda_1-\Delta\lambda} - R_{\lambda_1})/R_{\lambda_1+\Delta\lambda}$                                                  |
| mSR2       | $\lambda_1$ and $\Delta\lambda$ | $(R_{\lambda_1-\Delta\lambda} - R_{\lambda_1})/(R_{\lambda_1+\Delta\lambda} - R_{\lambda_1})$                                |
| mND        | $\lambda_1$ and $\Delta\lambda$ | $(R_{\lambda_1-\Delta\lambda} - R_{\lambda_1})/(R_{\lambda_1-\Delta\lambda} + R_{\lambda_1} - 2R_{\lambda_1+\Delta\lambda})$ |
| mID        | $\lambda_1$ and $\Delta\lambda$ | $R_{\lambda_1-\Delta\lambda}(\frac{1}{R_{\lambda_1}} - \frac{1}{R_{\lambda_1+\Delta\lambda}})$                               |

**Table S3.** The independent *t*-test for ChlFa parameters in all, sunlit and shaded leaves.

|                     | All Leaves Vs. Sunlit |       |         | All Leaves Vs. Shaded |       |         | Sunlit Vs. Shaded |       |         |
|---------------------|-----------------------|-------|---------|-----------------------|-------|---------|-------------------|-------|---------|
|                     | Df                    | t     | p-Value | Df                    | t     | p-Value | Df                | t     | p-Value |
| PSII <sub>max</sub> | 488.65                | -2.87 | <0.01   | 352.19                | 3.38  | <0.001  | 384.12            | 5.47  | <0.001  |
| NPQ                 | 432.19                | -0.59 | 0.55    | 410.02                | 0.85  | 0.40    | 406.67            | 1.24  | 0.21    |
| qL                  | 463.05                | -3.27 | <0.01   | 401.89                | 4.39  | <0.001  | 407.18            | 6.77  | <0.001  |
| ΦP                  | 450.19                | -2.92 | <0.01   | 418.15                | 4.11  | <0.001  | 407.64            | 6.17  | <0.001  |
| ΦN                  | 431.89                | 1.70  | 0.09    | 428.83                | -2.52 | <0.05   | 403.64            | -3.66 | <0.001  |
| ΦF                  | 585.23                | 4.94  | <0.001  | 314.50                | -4.62 | <0.001  | 302.80            | -8.22 | <0.001  |

**Table S4.** The ratio of performance to deviation (RPD) of reported indices for ChlF parameters in all leaves.

|          | PSII <sub>max</sub> | NPQ         | qL          | ΦP          | ΦN          | ΦF          |
|----------|---------------------|-------------|-------------|-------------|-------------|-------------|
| ARI2     | 1.00                | 1.00        | 1.02        | 1.01        | 1.00        | 1.03        |
| CRI1     | 1.00                | 1.00        | 1.07        | 1.05        | 1.02        | 1.07        |
| CRI2     | 1.00                | 1.00        | 1.06        | 1.04        | 1.02        | 1.05        |
| CUR      | 1.00                | 1.01        | 1.07        | 1.06        | 1.04        | 1.04        |
| Datt     | 1.01                | 1.00        | 1.01        | 1.01        | 1.00        | 1.01        |
| EVI      | 1.00                | 1.00        | 1.00        | 1.00        | 1.00        | 1.00        |
| Maccioni | 1.01                | 1.00        | 1.01        | 1.01        | 1.00        | 1.01        |
| mND705   | 1.01                | 1.00        | 1.02        | 1.02        | 1.01        | 1.03        |
| mSR705   | 1.01                | 1.00        | 1.01        | 1.01        | 1.00        | 1.01        |
| NDSI     | 1.00                | 1.00        | 1.13        | 1.11        | 1.06        | 1.07        |
| NDVI     | 1.00                | 1.00        | 1.12        | 1.10        | 1.05        | 1.07        |
| NDVI750  | 1.01                | 1.00        | 1.01        | 1.01        | 1.00        | 1.01        |
| NPCI     | 1.00                | 1.01        | 1.00        | 1.00        | 1.00        | 1.02        |
| OCAR     | 1.00                | 1.01        | 1.07        | 1.06        | 1.04        | 1.05        |
| PRI      | <b>1.03</b>         | 1.00        | 1.10        | 1.07        | 1.03        | 1.09        |
| PSNDa    | 1.00                | 1.00        | 1.12        | 1.10        | 1.06        | 1.07        |
| PSRI     | 1.01                | <b>1.02</b> | 1.01        | 1.02        | 1.02        | 1.00        |
| PSSRa    | 1.00                | 1.00        | 1.08        | 1.06        | 1.04        | 1.06        |
| RGI      | 1.01                | 1.00        | 1.13        | 1.10        | 1.05        | <b>1.11</b> |
| RSI      | 1.00                | 1.00        | <b>1.13</b> | <b>1.11</b> | <b>1.06</b> | 1.07        |
| SIPI     | 1.00                | 1.00        | 1.00        | 1.00        | 1.00        | 1.00        |
| SRI      | 1.00                | 1.00        | 1.08        | 1.06        | 1.04        | 1.06        |
| SRPI     | 1.00                | 1.01        | 1.00        | 1.00        | 1.00        | 1.02        |
| VOG1     | 1.01                | 1.00        | 1.01        | 1.01        | 1.00        | 1.02        |
| VOG2     | 1.01                | 1.00        | 1.00        | 1.00        | 1.00        | 1.02        |
| VOG3     | 1.01                | 1.00        | 1.00        | 1.00        | 1.00        | 1.01        |
| WBI      | 1.00                | 1.01        | 1.02        | 1.01        | 1.00        | 1.03        |
| YCAR     | 1.00                | 1.00        | 1.09        | 1.07        | 1.04        | 1.07        |

**Table S5.** The ratio of performance to deviation (RPD) of reported indices for ChlF parameters in sunlit leaves.

|          | <b>PSII<sub>max</sub></b> | <b>NPQ</b>  | <b>qL</b>   | <b>ΦP</b>   | <b>ΦN</b>   | <b>ΦF</b>   |
|----------|---------------------------|-------------|-------------|-------------|-------------|-------------|
| ARI2     | 1.00                      | 1.05        | 1.13        | 1.14        | <b>1.12</b> | 1.02        |
| CRI1     | 1.01                      | 1.02        | 1.00        | 1.00        | 1.00        | 1.04        |
| CRI2     | 1.01                      | 1.02        | 1.00        | 1.00        | 1.00        | 1.04        |
| CUR      | 1.05                      | 1.05        | 1.07        | 1.05        | 1.05        | 1.00        |
| Datt     | 1.04                      | 1.04        | 1.04        | 1.04        | 1.04        | 1.00        |
| EVI      | 1.02                      | 1.02        | 1.15        | <b>1.14</b> | 1.10        | 1.06        |
| Maccioni | 1.03                      | 1.04        | 1.05        | 1.04        | 1.04        | 1.00        |
| mND705   | 1.06                      | 1.03        | 1.03        | 1.03        | 1.03        | 1.00        |
| mSR705   | <b>1.06</b>               | 1.03        | 1.04        | 1.03        | 1.03        | 1.00        |
| NDSI     | 1.00                      | 1.00        | 1.03        | 1.02        | 1.01        | 1.05        |
| NDVI     | 1.00                      | 1.00        | 1.02        | 1.01        | 1.01        | 1.04        |
| NDVI750  | 1.05                      | 1.04        | 1.04        | 1.03        | 1.03        | 1.00        |
| NPCI     | 1.03                      | 1.01        | 1.01        | 1.02        | 1.02        | 1.00        |
| OCAR     | 1.04                      | 1.04        | 1.06        | 1.05        | 1.05        | 1.00        |
| PRI      | 1.01                      | 1.00        | 1.15        | 1.08        | 1.04        | <b>1.15</b> |
| PSNDa    | 1.00                      | 1.00        | 1.03        | 1.02        | 1.01        | 1.05        |
| PSRI     | 1.04                      | <b>1.07</b> | 1.02        | 1.03        | 1.04        | 1.02        |
| PSSRa    | 1.00                      | 1.01        | 1.01        | 1.01        | 1.00        | 1.03        |
| RGI      | 1.00                      | 1.02        | <b>1.16</b> | 1.12        | 1.08        | 1.08        |
| RSI      | 1.00                      | 1.00        | 1.03        | 1.02        | 1.01        | 1.05        |
| SIPI     | 1.06                      | 1.00        | 1.02        | 1.03        | 1.02        | 1.02        |
| SRI      | 1.00                      | 1.01        | 1.01        | 1.01        | 1.00        | 1.03        |
| SRPI     | 1.03                      | 1.01        | 1.01        | 1.01        | 1.01        | 1.00        |
| VOG1     | 1.02                      | 1.03        | 1.09        | 1.07        | 1.06        | 1.01        |
| VOG2     | 1.02                      | 1.03        | 1.11        | 1.07        | 1.06        | 1.02        |
| VOG3     | 1.02                      | 1.03        | 1.10        | 1.07        | 1.05        | 1.02        |
| WBI      | 1.03                      | 1.00        | 1.01        | 1.01        | 1.01        | 1.00        |
| YCAR     | 1.02                      | 1.02        | 1.08        | 1.06        | 1.04        | 1.02        |

**Table S6.** The ratio of performance to deviation (RPD) of reported indices for ChlF parameters in shaded leaves.

|          | PSII <sub>max</sub> | NPQ         | qL          | ΦP          | ΦN          | ΦF          |
|----------|---------------------|-------------|-------------|-------------|-------------|-------------|
| ARI2     | 1.02                | <b>1.07</b> | 1.03        | 1.07        | 1.11        | 1.00        |
| CRI1     | 1.01                | 1.05        | <b>1.94</b> | 1.78        | 1.44        | <b>1.10</b> |
| CRI2     | 1.01                | 1.07        | 1.82        | <b>1.82</b> | <b>1.50</b> | 1.08        |
| CUR      | 1.01                | 1.01        | 1.02        | 1.01        | 1.01        | 1.00        |
| Datt     | 1.02                | 1.05        | 1.33        | 1.30        | 1.23        | 1.04        |
| EVI      | <b>1.04</b>         | 1.04        | 1.28        | 1.32        | 1.22        | 1.05        |
| Maccioni | 1.02                | 1.05        | 1.31        | 1.29        | 1.22        | 1.04        |
| mND705   | 1.01                | 1.03        | 1.16        | 1.14        | 1.12        | 1.02        |
| mSR705   | 1.00                | 1.02        | 1.33        | 1.24        | 1.16        | 1.05        |
| NDSI     | 1.03                | 1.04        | 1.39        | 1.38        | 1.26        | 1.06        |
| NDVI     | 1.04                | 1.04        | 1.38        | 1.36        | 1.25        | 1.05        |
| NDVI750  | 1.02                | 1.04        | 1.27        | 1.24        | 1.19        | 1.03        |
| NPCI     | 1.01                | 1.00        | 1.00        | 1.01        | 1.01        | 1.00        |
| OCAR     | 1.00                | 1.02        | 1.03        | 1.03        | 1.04        | 1.00        |
| PRI      | 1.00                | 1.00        | 1.07        | 1.03        | 1.01        | 1.03        |
| PSNDa    | 1.03                | 1.04        | 1.36        | 1.35        | 1.24        | 1.05        |
| PSRI     | 1.00                | 1.01        | 1.01        | 1.01        | 1.01        | 1.00        |
| PSSRa    | 1.02                | 1.05        | 1.55        | 1.49        | 1.32        | 1.07        |
| RGI      | 1.03                | 1.01        | 1.01        | 1.01        | 1.00        | 1.02        |
| RSI      | 1.03                | 1.04        | 1.37        | 1.36        | 1.25        | 1.06        |
| SIPI     | 1.02                | 1.00        | 1.02        | 1.02        | 1.01        | 1.01        |
| SRI      | 1.02                | 1.05        | 1.55        | 1.49        | 1.32        | 1.07        |
| SRPI     | 1.01                | 1.00        | 1.00        | 1.00        | 1.00        | 1.00        |
| VOG1     | 1.01                | 1.04        | 1.37        | 1.30        | 1.21        | 1.05        |
| VOG2     | 1.00                | 1.04        | 1.43        | 1.35        | 1.23        | 1.06        |
| VOG3     | 1.00                | 1.04        | 1.45        | 1.36        | 1.23        | 1.06        |
| WBI      | 1.01                | 1.03        | 1.00        | 1.01        | 1.01        | 1.01        |
| YCAR     | 1.01                | 1.02        | 1.02        | 1.02        | 1.03        | 1.00        |

**Table S7.** Developed indices for quantifying ChlF parameters in all, sunlit and shaded leaves.

|                     | <b>All Leaves</b>              | <b>Sunlit</b>                  | <b>Shaded</b>                  |
|---------------------|--------------------------------|--------------------------------|--------------------------------|
| PSII <sub>max</sub> | ND <sub>Log</sub> (700, 1780)  | DDn <sub>1st</sub> (1400, 460) | mND <sub>EMSC</sub> (860, 60)  |
| NPQ                 | D <sub>1st</sub> (2000, 2050)  | DDn <sub>1st</sub> (1730, 770) | ND <sub>1st</sub> (450, 1100)  |
| qL                  | mSR <sub>1OR</sub> (1720, 150) | ND <sub>SNV</sub> (1300, 1910) | mSR <sub>1SNV</sub> (1670, 50) |
| ΦP                  | DDn <sub>1st</sub> (2000, 110) | DDn <sub>1st</sub> (2000, 490) | ND <sub>OR</sub> (1610, 1660)  |
| ΦN                  | ID <sub>1st</sub> (1900, 2000) | D <sub>1st</sub> (1730, 2490)  | D <sub>OR</sub> (1990, 2010)   |
| ΦF                  | ND <sub>1st</sub> (430, 1550)  | mND <sub>Log</sub> (1900, 320) | D <sub>1st</sub> (1640, 2270)  |
